# Supplementary material
Source: publisher figshare collection journal article supplement (https://acs.figshare.com/ndownloader/files/14999627)
Supplement: Supplementary file 1 [file 14999627]

Supplementary Information for

## **Transcutaneous co-delivery of tumor antigen and resiquimod in solid-in-oil nanodispersions promotes anti-tumor immunity**

Rie Wakabayashi,<sup>[a,c]</sup> Hidetoshi Kono,<sup>[a]</sup> Shuto Kozaka,<sup>[a]</sup> Yoshiro Tahara,<sup>[a]</sup> Noriho Kamiya,<sup>[a,b,c]</sup> and Masahiro Goto\*<sup>[a,b,c]</sup>

<sup>a</sup>Department of Applied Chemistry, Graduate School of Engineering, Kyushu University, Motooka 744, Nishi-ku, Fukuoka 819-0395, Japan.

<sup>b</sup>Advanced Transdermal Drug Delivery System Center, Kyushu University, Motooka 744, Nishi-ku, Fukuoka 819-0395, Japan.

<sup>c</sup>Center for Future Chemistry, Kyushu University, Motooka 744, Nishi-ku, Fukuoka 819-0395, Japan.

\*Corresponding author. E-mail: m-goto@mail.cstm.kyushu-u.ac.jp

### **Table of Contents**

|                                                                                                 |    |
|-------------------------------------------------------------------------------------------------|----|
| 1. Preparation of S/O nanodispersions                                                           | S2 |
| 2. Delivery of OVA into deeper region of the skin by S/O                                        | S3 |
| 3. Transcutaneous delivery of fluorescent dye and S/O nanoparticles                             | S4 |
| 4. Activation of cells in the skin by transcutaneous administration of R-848 S/O nanodispersion | S5 |
| 5. Migration of skin-derived LCs holding OVA to lymph node                                      | S6 |
| 6. OVA-specific IgG production in immunized mice                                                | S8 |
| 7. Accumulation of cytotoxic T cells in the E.G7-OVA tumor                                      | S9 |

## 1. Preparation of S/O nanodispersions

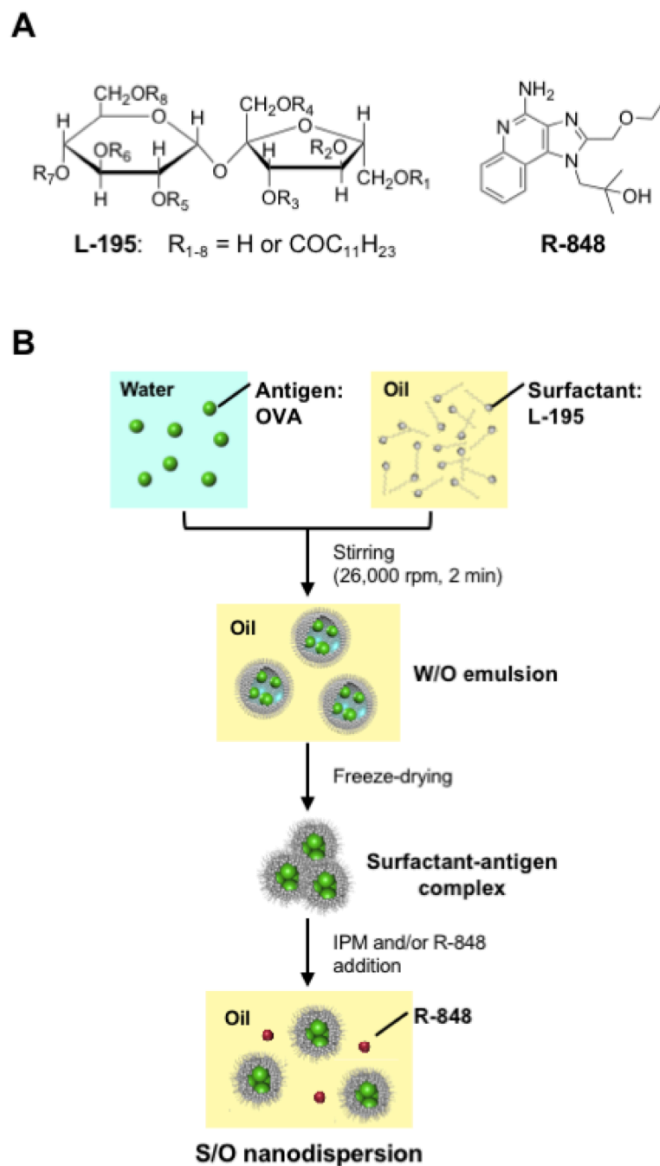

**Figure S1.** (A) Chemical structures of surfactant L-195 and Toll-like receptor ligand R-848 used in this study. (B) Preparation of S/O nanodispersion for co-delivery of OVA and R-848.

## 2. Delivery of OVA into deeper region of the skin by S/O

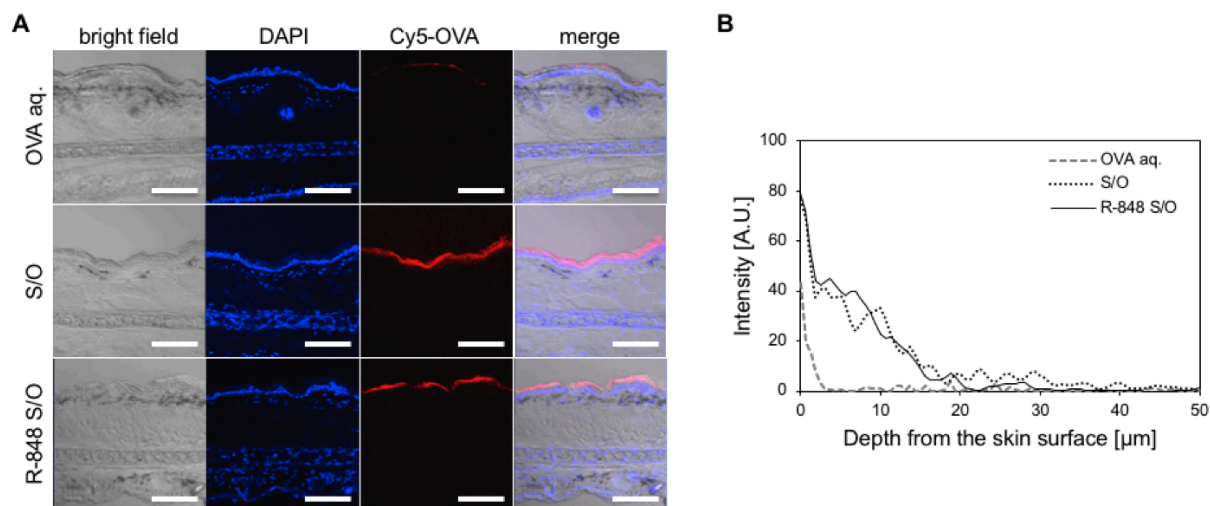

**Figure S2.** Transcutaneous delivery of OVA in the skin. (A) Light and fluorescence microscopy images of sections of ear auricles from C57BL/6N mice at 24 h after application of patches soaked in Cy5-OVA by PBS solution (OVA aq.), S/O nanodispersions without (S/O) or with (R-848 S/O) R-848. Skin sections were co-stained with DAPI to detect nuclei. Bars: 100  $\mu\text{m}$ . (B) Skin permeation of Cy5-OVA into the deeper region of the skin.

### 3. Transcutaneous delivery of fluorescent dye and S/O nanoparticles

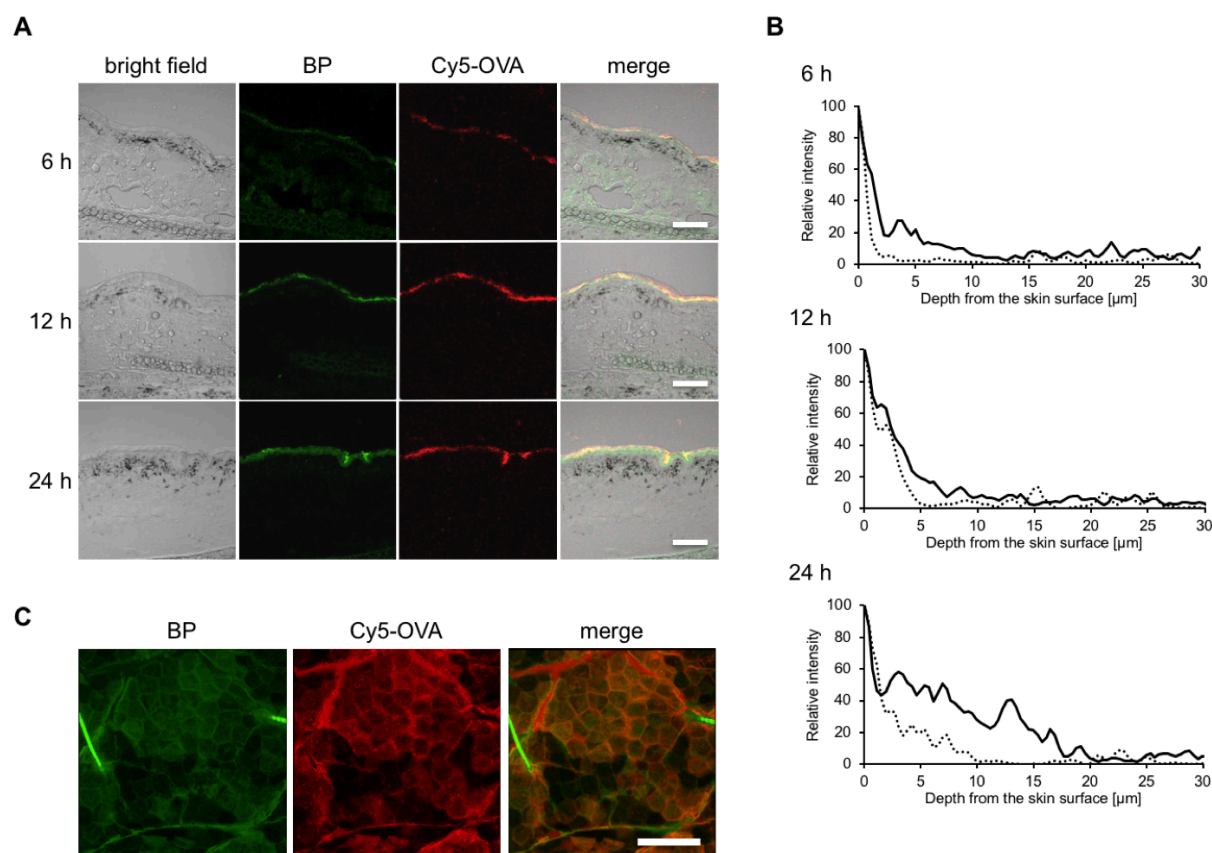

**Figure S3.** (A) Skin sectioning images after topical application of fluorescent dye BODIPY FL C<sub>5</sub> (BP) and Cy5-OVA by S/O nanodispersions. (B) Skin permeation kinetics of BP and Cy5-OVA. Solid lines: BP; dotted lines: Cy5-OVA. (C) Skin permeation pathway of BP and Cy5-OVA. Bars: 100  $\mu\text{m}$ .

#### 4. Activation of cells in the skin by transcutaneous administration of R-848 S/O nanodispersion

Patches immersed with samples (R-848, S/O, and R-848 S/O) were placed on the dorsal skin of C57BL/6N mice for 24 h. The skin was harvested and cell suspensions were prepared, which were stained with PECy7-conjugated anti-CD80 or anti-CD86 antibody (eBioscience) for flow cytometric analysis (Sony, ec800).

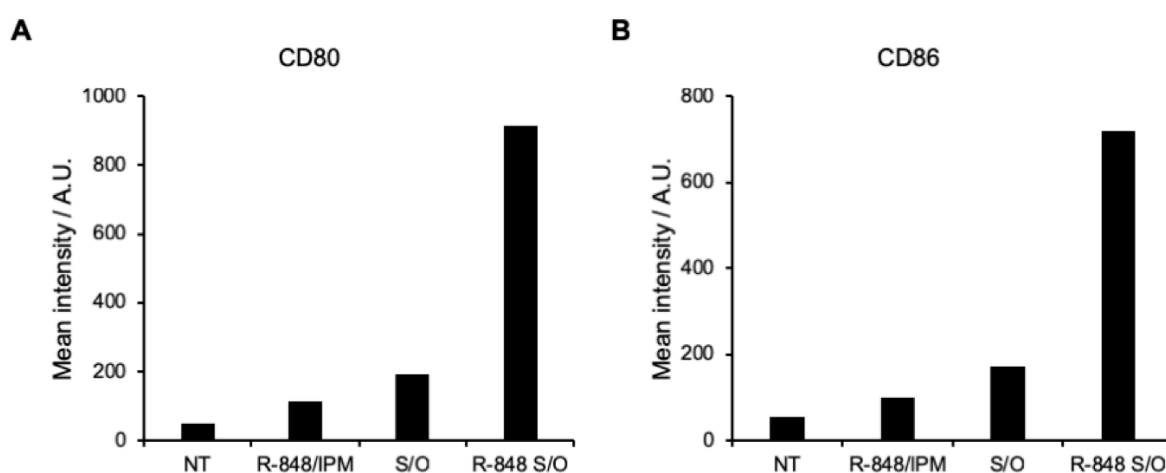

**Figure S4.** Activation of cells in the skin by transcutaneous administration of R-848 S/O nanodispersion. After 24 h administration, cell suspensions were prepared and stained with PECy7-conjugated anti-CD80 (A) or anti-CD86 (B) antibody.

## 5. Migration of skin-derived LCs holding OVA to lymph node.

Patches immersed with S/O or R-848 S/O nanodispersion were placed on the dorsal skin of C57BL/6N mice for 24 h. The patches were removed and the skin was wiped with 20% ethanol/water, and 30  $\mu$ L of FITC/dibutyl phthalate (5 mg/mL):acetone = 1:1 (vol:vol) were placed at the same sites for 24 h. The mice were sacrificed, and the draining LNs were harvested. Sections of LNs (20  $\mu$ m thickness) were imaged on confocal microscopy (Carl Zeiss, LSM700).

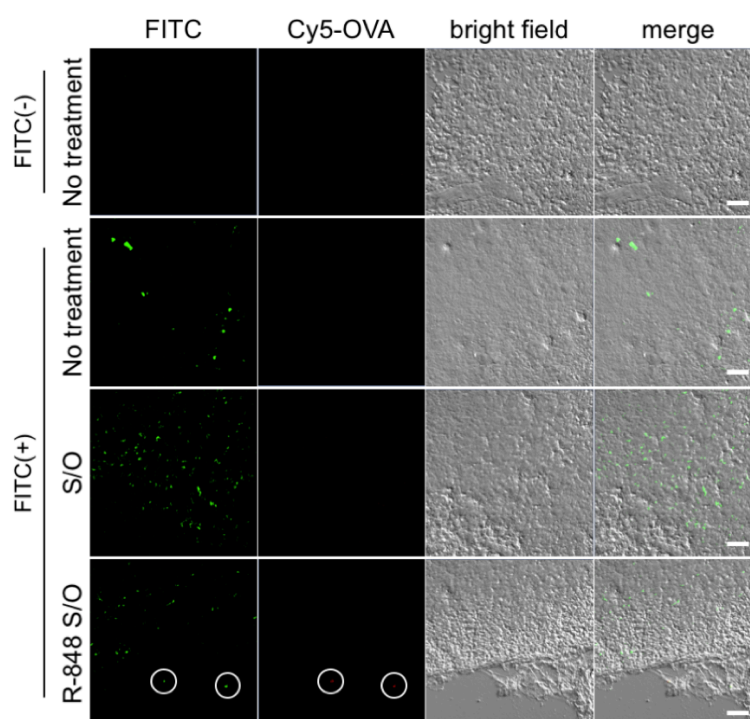

**Figure S5.** Migration of skin-derived DCs to lymph nodes. Fluorescence micrographs of draining lymph node sections from C57BL/6N mice after application of patches immersed with samples, followed by FITC painting to the dorsal skin. White circles indicate skin-derived LCs holding Cy5-OVA. Bars: 40  $\mu$ m.

Cell suspensions of LN were analyzed by flow cytometry (Sony, ec800) to identify which subset of skin-derived DCs is holding antigens. Briefly, C57BL/6N mice were immunized as above and LNs were harvested. Cell suspensions of LNs were stained with AlexaFluoro488-anti CD207 and PECy7-anti CD103 antibodies to distinguish LCs and dermal langerin<sup>+</sup> DCs as CD207<sup>+</sup> CD103<sup>-</sup> cells or CD207<sup>+</sup> CD103<sup>+</sup> cells, respectively.

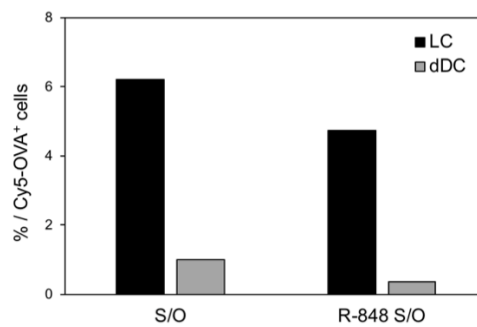

**Figure S6.** Percentage of LCs (CD207<sup>+</sup> CD103<sup>-</sup> cells) and dermal langerin<sup>+</sup> DCs (CD207<sup>+</sup> CD103<sup>+</sup> cells) among Cy5-OVA<sup>+</sup> cells in LN.

## 6. OVA-specific IgG production in immunized mice

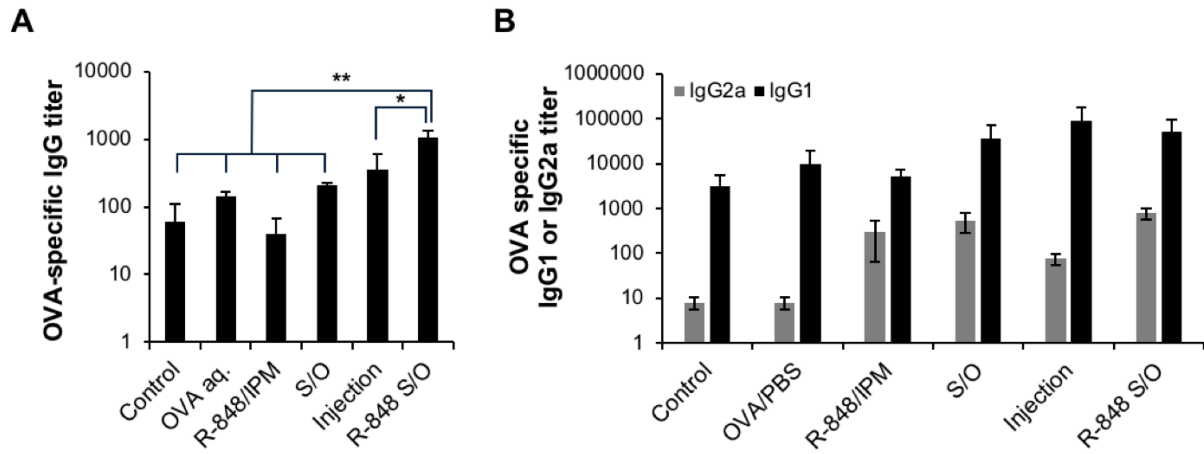

**Figure S7.** OVA specific total IgG titer (A) and IgG1 or IgG2a titer (B) in serum of immunized mice. N = 4, mean  $\pm$  SE, \* $p$  < 0.05, \*\* $p$  < 0.01.

**Table S1.** Balance of OVA-specific IgG1 and IgG2a in immunized mice.

| Group     | IgG1/IgG2a |
|-----------|------------|
| Control   | 386        |
| OVA/PBS   | 1250       |
| R-848/IPM | 18         |
| S/O       | 69         |
| Injection | 1194       |
| R-848 S/O | 66         |



## 7. Accumulation of cytotoxic T cells in the E.G7-OVA tumor

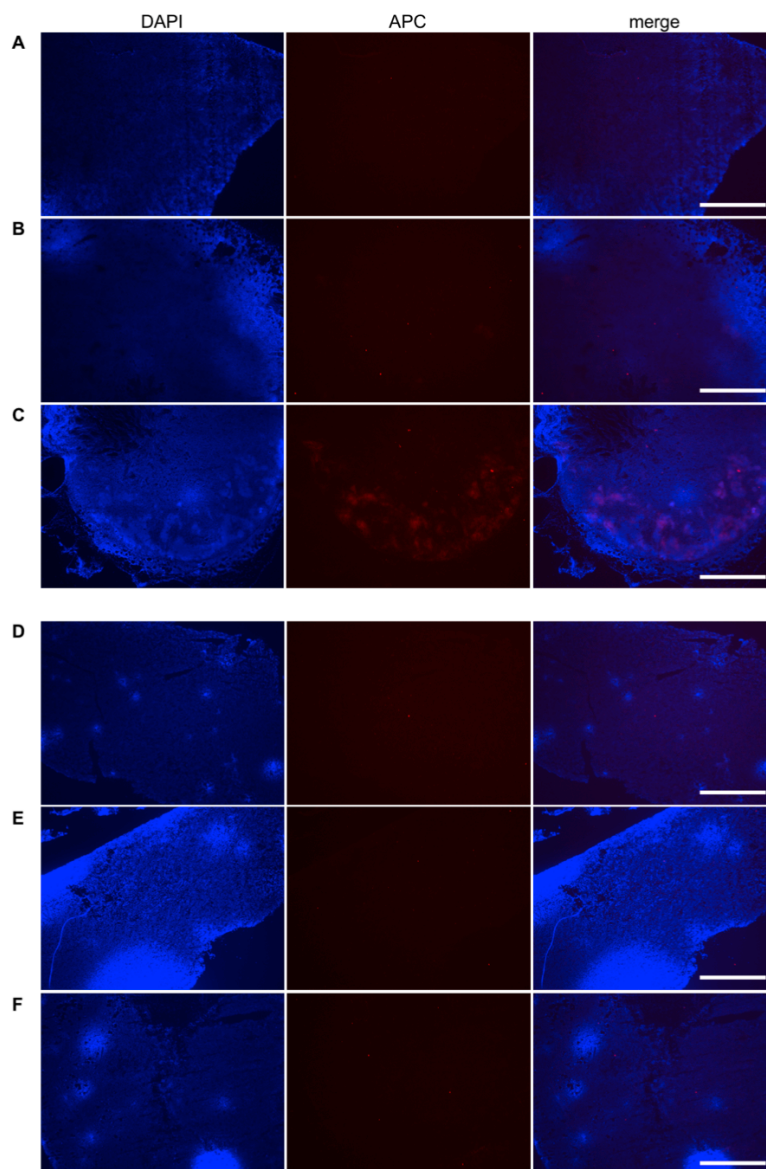

**Figure S8.** Accumulation of cytotoxic T cells (CTLs) at tumor site. C57BL/6N mice were immunized with s.c. injection or t.c. patch soaked with R-848 S/O nanodispersion twice and E.G7-OVA and EL4 tumor cells were inoculated. Twenty-one days after the inoculation, the tumors were harvested and sections of E.G7-OVA (A–C) or EL4 (D–F) were prepared. Sections were stained with APC-conjugated anti-CD8 to detect CTLs and DAPI to detect nuclei. Samples: (A, D) no treatment, (B, E) injection, (C, F) R-848 S/O. Bars: 1 mm.
